# Supplementary material for: The effect of sub-surface strontium depletion on oxygen diffusion in La0.6Sr0.4Co0.2Fe0.8O3−δ
Source: Royal Society of Chemistry journal article supplement (doi:10.1039/d0ta06058e), 2020-01-01
Supplement: d0ta06058e1.pdf [file d0ta06058e1.pdf]

# Supplementary information

## Estimated depth calculation

- In this work, the in-built ION-TOF depth estimation was used. It estimates a sputter rate using the beam current, raster area, atomic density of the material. We used a simple TRIM calculation to generate the sputter yield for each element.
  - Beam current: 271 nA
  - Raster area:  $0.15 \times 0.15 \text{ cm}^2$
  - Atomic density:  $8.5 \times 10^{22} \text{ atoms/cm}^3$  (calculated from reference [9])
  - TRIM sputter yields per incident Ar<sup>+</sup> ion at 60 degrees: La (0.2385), Sr (0.4904), Co (0.1188), Fe (0.4674) and O (2.73). Total sputtered per ion: 4.0451.
- Since we are using Ar<sup>+</sup>, the beam current (charge per time) is equal to the number of ions. So:
  - $271 \text{ nA} / \text{elemental charge } (1 \times 10^{-19}) = 1.69 \times 10^{12} \text{ ions per second}$
- The raster area is  $0.0225 \text{ cm}^2$ , so the dose density is:
  - $7.53611 \times 10^{13} \text{ ions/cm}^2 \cdot \text{s}$
- Which, factoring in the sputter yield:
  - $3.04843 \times 10^{14} \text{ ions/cm}^2 \cdot \text{s}$
- If the atomic density is  $8.5 \times 10^{22} \text{ atoms/cm}^3$ :
  - The number of atoms in one 'surface layer' is:  $8.5 \times 10^{22} \times 0.23 = 1.9373 \times 10^{15}$
  - The number of atoms along the 'height' of the volume is  $8.5 \times 10^{22} \times 1 \times 10^{-7} = 4.40148 \times 10^7$
  - The 'planar spacing' of the material is the height of the volume (here, simply 1 cm or  $1 \times 10^{-7} \text{ nm}$ ) divided by the number of atoms along the height:
    - $1 \times 10^{-7} / 4.40148 \times 10^7 = 0.23 \text{ nm}$
- Therefore, when a surface layer is removed ( $1.9373 \times 10^{15} \text{ atoms}$ ), 0.23 nm is removed.
- A sputter rate can therefore be calculated using:
  - $(\text{sputtered ions per second} / \text{number of atoms per layer}) \times \text{planar spacing}$
  - $0.0036 \text{ nm/s}$
